# Supplementary material for: High-Intensity Exercise Promotes Deleterious Cardiovascular Remodeling in a High-Cardiovascular-Risk Model: A Role for Oxidative Stress
Source: Antioxidants (Basel). 2023 Jul 20;12(7):1462. doi: 10.3390/antiox12071462 (PMC10376780; doi:10.3390/antiox12071462)
Supplement: Supplementary file 1 [file antioxidants-12-01462-s001.zip › Supplementary_pvalues_table.xlsx]

## Sheet: Figure 1
Figure 1A
Omnibus
G 4.2173 2 0.12140
timepoint 17.2871 9 0.04441 *
G:timepoint 60.8302 18 1.501e-06 ***
Posthoc comparisons
week = W0:
contrast estimate SE df t.ratio p.value
Int - Mod -6.25 23.1 34.2 -0.271 0.7880
Int - Sed -13.85 23.6 37.2 -0.587 0.5605
Mod - Sed -7.60 24.1 37.1 -0.315 0.7545
week = W1:
contrast estimate SE df t.ratio p.value
Int - Mod -2.59 23.1 34.2 -0.112 0.9113
Int - Sed -9.66 23.6 37.2 -0.409 0.6846
Mod - Sed -7.06 24.1 37.1 -0.293 0.7712
week = W3:
contrast estimate SE df t.ratio p.value
Int - Mod -15.81 23.1 34.2 -0.685 0.4980
Int - Sed -30.64 23.6 37.2 -1.299 0.2019
Mod - Sed -14.83 24.1 37.1 -0.615 0.5423
week = W4:
contrast estimate SE df t.ratio p.value
Int - Mod -24.21 23.1 34.2 -1.049 0.3016
Int - Sed -35.14 23.6 37.2 -1.490 0.1447
Mod - Sed -10.93 24.1 37.1 -0.453 0.6530
week = W5:
contrast estimate SE df t.ratio p.value
Int - Mod -28.18 23.1 34.2 -1.221 0.2304
Int - Sed -42.48 23.1 34.2 -1.841 0.0744
Mod - Sed -14.30 23.6 34.2 -0.605 0.5490
week = W6:
contrast estimate SE df t.ratio p.value
Int - Mod -31.98 23.1 34.2 -1.386 0.1748
Int - Sed -45.48 23.1 34.2 -1.971 0.0569
Mod - Sed -13.50 23.6 34.2 -0.571 0.5714
week = W7:
contrast estimate SE df t.ratio p.value
Int - Mod -33.39 23.1 34.2 -1.447 0.1571
Int - Sed -63.59 23.1 34.2 -2.755 0.0093
Mod - Sed -30.20 23.6 34.2 -1.278 0.2097
week = W8:
contrast estimate SE df t.ratio p.value
Int - Mod -32.15 23.1 34.6 -1.389 0.1738
Int - Sed -59.45 23.1 34.6 -2.568 0.0147
Mod - Sed -27.30 23.6 34.2 -1.156 0.2559
week = W9:
contrast estimate SE df t.ratio p.value
Int - Mod -35.35 23.1 34.6 -1.527 0.1359
Int - Sed -53.15 23.1 34.6 -2.296 0.0279
Mod - Sed -17.80 23.6 34.2 -0.753 0.4563
week = W10:
contrast estimate SE df t.ratio p.value
Int - Mod -47.30 23.8 38.6 -1.987 0.0541
Int - Sed -79.82 23.6 37.6 -3.376 0.0017
Mod - Sed -32.52 24.4 38.8 -1.333 0.1903
Figure 1B
Test for linear trend
Slope	-0.6185
SE of slope	-0.2871
95% CI of slope	-0.03043 to -1.206
P value	0.04
P value summary	*
Is linear trend significant (P < 0.05)?	Yes
Figure 1C
Omnibus
Analysis of Deviance Table (Type II Wald chisquare tests)
Response: glicemia
Chisq Df Pr(>Chisq)
G 7.0587 2 0.02932 *
time 419.7644 5 < 2.2e-16 ***
G:time 45.4457 10 1.807e-06 ***
Posthoc comparisons
$emmeans
time = T0:
G emmean SE df lower.CL upper.CL
Int 128 32.7 54.9 62.9 194
Mod 127 32.7 54.9 61.6 193
Sed 116 32.7 54.9 50.6 182
time = T15:
G emmean SE df lower.CL upper.CL
Int 316 32.7 54.9 250.9 382
Mod 282 32.7 54.9 216.2 347
Sed 461 32.7 54.9 395.4 526
time = T30:
G emmean SE df lower.CL upper.CL
Int 368 32.7 54.9 302.5 433
Mod 327 32.7 54.9 261.9 393
Sed 525 32.7 54.9 459.8 591
time = T60:
G emmean SE df lower.CL upper.CL
Int 355 32.7 54.9 289.9 421
Mod 344 32.7 54.9 278.1 409
Sed 437 32.7 54.9 371.2 502
time = T90:
G emmean SE df lower.CL upper.CL
Int 284 32.7 54.9 218.3 349
Mod 272 32.7 54.9 206.7 338
Sed 342 32.7 54.9 276.0 407
time = T120:
G emmean SE df lower.CL upper.CL
Int 212 32.7 54.9 146.1 277
Mod 222 32.7 54.9 156.5 287
Sed 261 32.7 54.9 195.7 327
Degrees-of-freedom method: kenward-roger
Confidence level used: 0.95
$contrasts
time = T0:
contrast estimate SE df t.ratio p.value
Int - Mod 1.3 46.2 54.9 0.028 0.9777
Int - Sed 12.3 46.2 54.9 0.266 0.7911
Mod - Sed 11.0 46.2 54.9 0.238 0.8127
time = T15:
contrast estimate SE df t.ratio p.value
Int - Mod 34.7 46.2 54.9 0.751 0.4558
Int - Sed -144.5 46.2 54.9 -3.128 0.0028
Mod - Sed -179.2 46.2 54.9 -3.879 0.0003
time = T30:
contrast estimate SE df t.ratio p.value
Int - Mod 40.6 46.2 54.9 0.879 0.3834
Int - Sed -157.3 46.2 54.9 -3.405 0.0012
Mod - Sed -197.9 46.2 54.9 -4.283 0.0001
time = T60:
contrast estimate SE df t.ratio p.value
Int - Mod 11.8 46.2 54.9 0.255 0.7994
Int - Sed -81.3 46.2 54.9 -1.760 0.0840
Mod - Sed -93.1 46.2 54.9 -2.015 0.0488
time = T90:
contrast estimate SE df t.ratio p.value
Int - Mod 11.6 46.2 54.9 0.251 0.8027
Int - Sed -57.7 46.2 54.9 -1.249 0.2170
Mod - Sed -69.3 46.2 54.9 -1.500 0.1393
time = T120:
contrast estimate SE df t.ratio p.value
Int - Mod -10.4 46.2 54.9 -0.225 0.8227
Int - Sed -49.6 46.2 54.9 -1.074 0.2877
Mod - Sed -39.2 46.2 54.9 -0.848 0.3999
Degrees-of-freedom method: kenward-roger
Figure 1D
Omnibus test
ANOVA summary
F	3.448
P value	0.0464
P value summary	*
Significant diff. among means (P < 0.05)?	Yes
R squared	0.2035
Posthoc comparisons
Uncorrected Fisher's LSD	Mean Diff.	95.00% CI of diff.	Significant?	Summary	Individual P Value
SED vs. MOD	12.72	2.028 to 23.41	Yes	*	0.0215	A-B
SED vs. INT	10.73	0.03823 to 21.42	Yes	*	0.0492	A-C
MOD vs. INT	-1.99	-12.68 to 8.701	No	ns	0.7055	B-C
Figure 1E
Omnibus test
Analysis of Deviance Table (Type II Wald chisquare tests)
Response: insulina
Chisq Df Pr(>Chisq)
G 1.6453 2 0.43928
time 25.5382 1 4.337e-07 ***
G:time 6.0745 2 0.04797 *
Posthoc comparisons
$emmeans
G = Int:
time emmean SE df lower.CL upper.CL
Bsl 1.94 0.665 51.3 0.600 3.27
T30 5.39 0.665 51.3 4.057 6.73
G = Mod:
time emmean SE df lower.CL upper.CL
Bsl 1.48 0.665 51.3 0.148 2.82
T30 4.79 0.703 51.9 3.376 6.20
G = Sed:
time emmean SE df lower.CL upper.CL
Bsl 2.34 0.665 51.3 1.003 3.67
T30 3.14 0.665 51.3 1.809 4.48
Degrees-of-freedom method: kenward-roger
Confidence level used: 0.95
$contrasts
G = Int:
contrast estimate SE df t.ratio p.value
Bsl - T30 -3.457 0.850 26.2 -4.067 0.0004
G = Mod:
contrast estimate SE df t.ratio p.value
Bsl - T30 -3.303 0.879 27.5 -3.756 0.0008
G = Sed:
contrast estimate SE df t.ratio p.value
Bsl - T30 -0.806 0.850 26.2 -0.949 0.3513
Degrees-of-freedom method: kenward-roger
Figure 1F
Omnibus test
ANOVA summary
F	0.339
P value	0.7155
P value summary	ns
Significant diff. among means (P < 0.05)?	No
R squared	0.02449

## Sheet: Figure 2
Figure 2A
Test for linear trend
Slope	0.1847
SE of slope	0.08107
95% CI of slope	0,01775 to 0,3517
P value	0.0315
P value summary	*
Is linear trend significant (P < 0,05)?	Yes
Figure 2C
Omnibus test
ANOVA summary
F	3.734
P value	0.0375
P value summary	*
Significant diff. among means (P < 0.05)?	Yes
R squared	0.2232
Posthoc comparisons
Uncorrected Fisher's LSD	Mean Diff.	95.00% CI of diff.	Significant?	Summary	Individual P Value
SED vs. MOD	0.05744	-0.02607 to 0.1410	No	ns	0.1692	A-B
SED vs. INT	-0.05056	-0.1341 to 0.03296	No	ns	0.2245	A-C
MOD vs. INT	-0.108	-0.1893 to -0.02672	Yes	*	0.0112	B-C
Figure 2D
Omnibus
ANOVA summary
F	4.809
P value	0.0171
P value summary	*
Significant diff. among means (P < 0.05)?	Yes
R squared	0.2778
Posthoc comparisons
Uncorrected Fisher's LSD	Mean Diff.	95.00% CI of diff.	Significant?	Summary	Individual P Value
SED vs. MOD	-0.1565	-0.3241 to 0.01106	No	ns	0.0659	A-B
SED vs. INT	-0.2515	-0.4191 to -0.08394	Yes	**	0.0048	A-C
MOD vs. INT	-0.095	-0.2530 to 0.06298	No	ns	0.227	B-C
Figure 2E
Omnibus test
ANOVA summary
F	2.065
P value	0.1479
P value summary	ns
Significant diff. among means (P < 0.05)?	No
R squared	0.1418
Figure 2F
Omnibus test
ANOVA summary
F	3.736
P value	0.0381
P value summary	*
Significant diff. among means (P < 0.05)?	Yes
R squared	0.2301
Posthoc comparisons
Uncorrected Fisher's LSD	Mean Diff.	95.00% CI of diff.	Significant?	Summary	Individual P Value
SED vs. MOD	3.35	-1.987 to 8.687	No	ns	0.2079	A-B
SED vs. INT	7.05	1.713 to 12.39	Yes	*	0.0117	A-C
MOD vs. INT	3.7	-1.331 to 8.731	No	ns	0.1424	B-C
Figure 2G
Omnibus test
ANOVA summary
F	3.693
P value	0.0393
P value summary	*
Significant diff. among means (P < 0.05)?	Yes
R squared	0.228
Posthoc comparisons
Uncorrected Fisher's LSD	Mean Diff.	95.00% CI of diff.	Significant?	Summary	Individual P Value
SED vs. MOD	5.45	-3.671 to 14.57	No	ns	0.2299	A-B
SED vs. INT	11.95	2.829 to 21.07	Yes	*	0.0123	A-C
MOD vs. INT	6.5	-2.099 to 15.10	No	ns	0.1321	B-C
Figure 2H
Omnibus test
ANOVA summary
F	0.0381
P value	0.9627
P value summary	ns
Significant diff. among means (P < 0.05)?	No
R squared	0.003995

## Sheet: Figure 3
Figure 3A
Omnibus
Anova Table (Type II tests)
Response: fibrosis
Sum Sq Df F value Pr(>F)
G 225.86 3 2.1309 0.1206
Residuals 918.62 26
Figure 3B
Omnibus
ANOVA summary
F	40.13
P value	<0.0001
P value summary	****
Significant diff. among means (P < 0.05)?	Yes
R squared	0.8005
Posthoc comparisons
	Mean Diff.	Discovery?	q value	Individual P Value
SED vs. MOD	-0.3043	Yes	0.0208	0.0495	A-B
SED vs. INT	-0.4118	Yes	0.005	0.0095	A-C
SED vs. CTL	-1.302	Yes	<0.0001	<0.0001	A-D
MOD vs. INT	-0.1075	No	0.1213	0.3465	B-C
MOD vs. CTL	-0.998	Yes	<0.0001	<0.0001	B-D
INT vs. CTL	-0.8905	Yes	<0.0001	<0.0001	C-D
Figure 3C
Omnibus
ANOVA summary
F	61.06
P value	<0.0001
P value summary	****
Significant diff. among means (P < 0.05)?	Yes
R squared	0.8593
Posthoc comparisons
	Mean Diff.	Discovery?	q value	Individual P Value
SED vs. MOD	-0.1267	No	0.1017	0.1615	A-B
SED vs. INT	-0.1818	Yes	0.038	0.0482	A-C
SED vs. CTL	-0.8796	Yes	<0.0001	<0.0001	A-D
MOD vs. INT	-0.05508	No	0.2182	0.4156	B-C
MOD vs. CTL	-0.7529	Yes	<0.0001	<0.0001	B-D
INT vs. CTL	-0.6978	Yes	<0.0001	<0.0001	C-D
Figure 3D
Omnibus
ANOVA summary
F	21.44
P value	<0.0001
P value summary	****
Significant diff. among means (P < 0.05)?	Yes
R squared	0.682
Posthoc comparisons
	Mean Diff.	Discovery?	q value	Individual P Value
SED vs. MOD	10.62	No	0.4105	0.5529	A-B
SED vs. INT	4.518	No	0.4201	0.8002	A-C
SED vs. CTL	-83.68	Yes	<0.0001	<0.0001	A-D
MOD vs. INT	-6.1	No	0.4105	0.6516	B-C
MOD vs. CTL	-94.3	Yes	<0.0001	<0.0001	B-D
INT vs. CTL	-88.2	Yes	<0.0001	<0.0001	C-D

## Sheet: Figure 6
Figure 6A - p47
Omnibus
ANOVA summary
F	6.619
P value	0.0015
P value summary	**
Significant diff. among means (P < 0.05)?	Yes
R squared	0.4064
Posthoc comparisons
	Mean Diff.	Discovery?	q value	Individual P Value
SED vs. MOD	-0.1022	No	0.4164	0.2776	A-B
SED vs. INT	-0.06732	No	0.5744	0.4787	A-C
SED vs. CTL	0.1844	No	0.1106	0.0553	A-D
MOD vs. INT	0.03486	No	0.6306	0.6306	B-C
MOD vs. CTL	0.2866	Yes	0.0018	0.0003	B-D
INT vs. CTL	0.2517	Yes	0.0045	0.0015	C-D
Figure 6A - Nox2
Omnibus
ANOVA summary
F	4.817
P value	0.0074
P value summary	**
Significant diff. among means (P < 0.05)?	Yes
R squared	0.3251
Posthoc comparisons
	Mean Diff.	Discovery?	q value	Individual P Value
SED vs. MOD	-1.06	No	0.974	0.974	A-B
SED vs. INT	-45.35	No	0.2049	0.1707	A-C
SED vs. CTL	47.46	No	0.2049	0.1522	A-D
MOD vs. INT	-44.29	No	0.1596	0.0798	B-C
MOD vs. CTL	48.52	No	0.1596	0.0561	B-D
INT vs. CTL	92.81	Yes	0.004	0.0007	C-D
Figure 6B - Cat
Omnibus
ANOVA summary
F	4.461
P value	0.0114
P value summary	*
Significant diff. among means (P < 0.05)?	Yes
R squared	0.3314
Posthoc comparisons
	Mean Diff.	Discovery?	q value	Individual P Value
SED vs. MOD	-0.09402	No	0.3758	0.5369	A-B
SED vs. INT	-0.1812	No	0.234	0.2229	A-C
SED vs. CTL	0.216	No	0.2165	0.1547	A-D
MOD vs. INT	-0.08717	No	0.3758	0.4606	B-C
MOD vs. CTL	0.31	Yes	0.0314	0.015	B-D
INT vs. CTL	0.3972	Yes	0.0065	0.0015	C-D
Figure 6B - Sod2
Omnibus
ANOVA summary
F	7.488
P value	0.0007
P value summary	***
Significant diff. among means (P < 0.05)?	Yes
R squared	0.4282
Posthoc comparisons
	Mean Diff.	Discovery?	q value	Individual P Value
SED vs. MOD	-16.41	No	0.3022	0.4798	A-B
SED vs. INT	11.23	No	0.3296	0.6278	A-C
SED vs. CTL	62.93	Yes	0.0106	0.0101	A-D
MOD vs. INT	27.64	No	0.0955	0.1213	B-C
MOD vs. CTL	79.34	Yes	0.0002	<0.0001	B-D
INT vs. CTL	51.7	Yes	0.0089	0.0056	C-D
Figure 6B - Sod2
Omnibus
ANOVA summary
F	4.089
P value	0.0151
P value summary	*
Significant diff. among means (P < 0.05)?	Yes
R squared	0.2903
Posthoc comparisons
	Mean Diff.	Discovery?	q value	Individual P Value
SED vs. MOD	-15.82	No	0.4772	0.3649	A-B
SED vs. INT	-4.665	No	0.788	0.788	A-C
SED vs. CTL	27.93	No	0.2293	0.1146	A-D
MOD vs. INT	11.15	No	0.4772	0.3976	B-C
MOD vs. CTL	43.75	Yes	0.0126	0.0021	B-D
INT vs. CTL	32.6	No	0.0533	0.0178	C-D
Figure 6B - Nrf2
Omnibus
ANOVA summary
F	3.494
P value	0.0276
P value summary	*
Significant diff. among means (P < 0.05)?	Yes
R squared	0.2589
Posthoc comparisons
	Mean Diff.	Discovery?	q value	Individual P Value
SED vs. MOD	-12.46	No	0.5906	0.4585	A-B
SED vs. INT	-11.54	No	0.5906	0.4922	A-C
SED vs. CTL	23.16	No	0.3461	0.173	A-D
MOD vs. INT	0.924	No	0.9418	0.9418	B-C
MOD vs. CTL	35.62	Yes	0.0288	0.008	B-D
INT vs. CTL	34.7	Yes	0.0288	0.0096	C-D
Figure 6B - Gch1
Omnibus
ANOVA summary
F	5.06
P value	0.0059
P value summary	**
Significant diff. among means (P < 0.05)?	Yes
R squared	0.336
Posthoc comparisons
Original FDR method of Benjamini and Hochberg	Mean Diff.	Discovery?	q value	Individual P Value
SED vs. MOD	-85.11	No	0.2837	0.1418	A-B
SED vs. INT	-67.38	No	0.3078	0.2417	A-C
SED vs. CTL	65.25	No	0.3078	0.2565	A-D
MOD vs. INT	17.73	No	0.6805	0.6805	B-C
MOD vs. CTL	150.4	Yes	0.0083	0.0014	B-D
INT vs. CTL	132.6	Yes	0.0122	0.0041	C-D
Figure 6C
Omnibus
ANOVA summary
F	0.6297
P value	0.6043
P value summary	ns
Significant diff. among means (P < 0.05)?	No
R squared	0.0863
Figure 6D - p47
Omnibus
ANOVA summary
F	2.62
P value	0.0954
P value summary	ns
Significant diff. among means (P < 0.05)?	No
R squared	0.1924
Figure 6D - Nox2
Omnibus
ANOVA summary
F	3.448
P value	0.0498
P value summary	*
Significant diff. among means (P < 0.05)?	Yes
R squared	0.2386
Posthoc comparisons
Uncorrected Fisher's LSD	Mean Diff.	95.00% CI of diff.	Significant?	Summary	Individual P Value
SED vs. MOD	-2.057	-33.51 to 29.40	No	ns	0.8934	A-B
SED vs. INT	-28.92	-61.91 to 4.076	No	ns	0.0828	A-C
MOD vs. INT	-28.96	-54.65 to -3.279	Yes	*	0.0288	B-C
Figure 6E - Cat
Omnibus
ANOVA summary
F	0.5089
P value	0.6081
P value summary	ns
Significant diff. among means (P < 0.05)?	No
R squared	0.04422
Figure 6E - Sod2
Omnibus
ANOVA summary
F	3.657
P value	0.0425
P value summary	*
Significant diff. among means (P < 0.05)?	Yes
R squared	0.2495
Posthoc comparisons
Uncorrected Fisher's LSD	Mean Diff.	95.00% CI of diff.	Significant?	Summary	Individual P Value
SED vs. MOD	12.34	-6.583 to 31.26	No	ns	0.19	A-B
SED vs. INT	24.15	5.232 to 43.08	Yes	*	0.0147	A-C
MOD vs. INT	11.82	-3.635 to 27.26	No	ns	0.127	B-C
Figure 6E - Gpx1
Omnibus
ANOVA summary
F	0.4638
P value	0.6349
P value summary	ns
Significant diff. among means (P < 0.05)?	No
R squared	0.04045
Figure 6E - Gpx1
Omnibus
ANOVA summary
F	0.2083
P value	0.8135
P value summary	ns
Significant diff. among means (P < 0.05)?	No
R squared	0.01859
Figure 6E - Gch1
Omnibus
ANOVA summary
F	4.156
P value	0.0309
P value summary	*
Significant diff. among means (P < 0.05)?	Yes
R squared	0.2936
Posthoc comparisons
Uncorrected Fisher's LSD	Mean Diff.	95.00% CI of diff.	Significant?	Summary	Individual P Value
SED vs. MOD	0.006715	-0.06591 to 0.07933	No	ns	0.849	A-B
SED vs. INT	0.08103	0.008408 to 0.1536	Yes	*	0.0306	A-C
MOD vs. INT	0.07431	0.01294 to 0.1357	Yes	*	0.0201	B-C

## Sheet: Figure 7
Figure 7B
Omnibus
ANOVA summary
F	3.076
P value	0.0405
P value summary	*
Significant diff. among means (P < 0.05)?	Yes
R squared	0.2135
Posthoc comparisons
	Mean Diff.	Discovery?	q value	Individual P Value
SED vs. MOD	-6.4	No	0.8781	0.7318	A-B
SED vs. INT	-7.5	No	0.8781	0.688	A-C
SED vs. CTL	38.29	No	0.0927	0.0464	A-D
MOD vs. INT	-1.1	No	0.9501	0.9501	B-C
MOD vs. CTL	44.69	Yes	0.0453	0.0151	B-D
INT vs. CTL	45.79	Yes	0.0453	0.013	C-D
Figure 7C
Omnibus
ANOVA summary
F	4.798
P value	0.007
P value summary	**
Significant diff. among means (P < 0.05)?	Yes
R squared	0.3037
Posthoc comparisons
	Mean Diff.	Discovery?	q value	Individual P Value
SED vs. MOD	-28.26	No	0.1964	0.1309	A-B
SED vs. INT	16.61	No	0.3805	0.3805	A-C
SED vs. CTL	34.73	No	0.1314	0.0657	A-D
MOD vs. INT	44.87	No	0.07	0.021	B-C
MOD vs. CTL	62.99	Yes	0.0052	0.0009	B-D
INT vs. CTL	18.12	No	0.3752	0.3127	C-D
Figure 7D
Omnibus
ANOVA summary
F	2.036
P value	0.1273
P value summary	ns
Significant diff. among means (P < 0.05)?	No
R squared	0.1523
Figure 7E
Omnibus
ANOVA summary
F	5.16
P value	0.0049
P value summary	**
Significant diff. among means (P < 0.05)?	Yes
R squared	0.3193
Posthoc comparisons
	Mean Diff.	Discovery?	q value	Individual P Value
SED vs. MOD	0.6107	No	0.3108	0.4934	A-B
SED vs. INT	-0.07309	No	0.4914	0.936	A-C
SED vs. CTL	-2.437	Yes	0.0097	0.0093	A-D
MOD vs. INT	-0.6838	No	0.3108	0.4291	B-C
MOD vs. CTL	-3.048	Yes	0.0027	0.0009	B-D
INT vs. CTL	-2.364	Yes	0.0097	0.0092	C-D
Figure 7F
Omnibus
ANOVA summary
F	2.109
P value	0.1185
P value summary	ns
Significant diff. among means (P < 0.05)?	No
R squared	0.1651
Figure 7G
Omnibus
ANOVA summary
F	9.566
P value	0.0001
P value summary	***
Significant diff. among means (P < 0.05)?	Yes
R squared	0.4807
Posthoc comparisons
	Mean Diff.	Discovery?	q value	Individual P Value
SED vs. MOD	-0.2723	No	0.1688	0.2144	A-B
SED vs. INT	-0.05687	No	0.4187	0.7974	A-C
SED vs. CTL	-0.9965	Yes	0.0001	<0.0001	A-D
MOD vs. INT	0.2154	No	0.183	0.2904	B-C
MOD vs. CTL	-0.7242	Yes	0.0011	0.001	B-D
INT vs. CTL	-0.9397	Yes	0.0001	<0.0001	C-D
Figure 7H
Omnibus
ANOVA summary
F	3.254
P value	0.0335
P value summary	*
Significant diff. among means (P < 0.05)?	Yes
R squared	0.2231
Posthoc comparisons
	Mean Diff.	Discovery?	q value	Individual P Value
SED vs. MOD	0.0252	No	0.8556	0.7886	A-B
SED vs. INT	-0.0171	No	0.8556	0.8556	A-C
SED vs. CTL	0.2307	No	0.0509	0.0185	A-D
MOD vs. INT	-0.0423	No	0.8556	0.6335	B-C
MOD vs. CTL	0.2055	No	0.0509	0.0254	B-D
INT vs. CTL	0.2478	Yes	0.0479	0.008	C-D
Figure 7I
Omnibus
ANOVA summary
F	0.431
P value	0.7322
P value summary	ns
Significant diff. among means (P < 0.05)?	No
R squared	0.03883

## Sheet: Figure 8
Figure 8A - αMhc
Omnibus
ANOVA summary
F	15.93
P value	<0.0001
P value summary	****
Significant diff. among means (P < 0.05)?	Yes
R squared	0.5703
Posthoc comparisons
	Mean Diff.	Discovery?	q value	Individual P Value
SED vs. MOD	-26.84	Yes	0.0293	0.0466	A-B
SED vs. INT	-27.11	Yes	0.0293	0.0445	A-C
SED vs. CTL	-86.92	Yes	<0.0001	<0.0001	A-D
MOD vs. INT	-0.274	No	0.5162	0.9833	B-C
MOD vs. CTL	-60.09	Yes	<0.0001	<0.0001	B-D
INT vs. CTL	-59.81	Yes	<0.0001	<0.0001	C-D
Figure 8A - βMhc
Omnibus
ANOVA summary
F	4.727
P value	0.007
P value summary	**
Significant diff. among means (P < 0.05)?	Yes
R squared	0.2826
Posthoc comparisons
	Mean Diff.	Discovery?	q value	Individual P Value
SED vs. MOD	30.43	No	0.0978	0.0133	A-B
SED vs. INT	16.6	No	0.6026	0.164	A-C
SED vs. CTL	41.59	Yes	0.0087	0.0011	A-D
MOD vs. INT	-13.83	No	0.7187	0.2445	B-C
MOD vs. CTL	11.17	No	0.8468	0.3456	B-D
INT vs. CTL	24.99	No	0.1926	0.0393	C-D
Figure 8B
Omnibus
ANOVA summary
F	9.772
P value	<0.0001
P value summary	****
Significant diff. among means (P < 0.05)?	Yes
R squared	0.4488
Posthoc comparisons
	Mean Diff.	Discovery?	q value	Individual P Value
SED vs. MOD	0.28	Yes	0.0024	0.0069	A-B
SED vs. INT	0.2241	Yes	0.0059	0.0279	A-C
SED vs. CTL	0.5262	Yes	<0.0001	<0.0001	A-D
MOD vs. INT	-0.05594	No	0.0999	0.5708	B-C
MOD vs. CTL	0.2462	Yes	0.0043	0.0164	B-D
INT vs. CTL	0.3022	Yes	0.002	0.0038	C-D
Figure 8C - N2b
Omnibus
ANOVA summary
F	0.782
P value	0.5118
P value summary	ns
Significant diff. among means (P < 0.05)?	No
R squared	0.06118
Figure 8C - N2ba
Omnibus
ANOVA summary
F	4.735
P value	0.0069
P value summary	**
Significant diff. among means (P < 0.05)?	Yes
R squared	0.2829
Posthoc comparisons
	Mean Diff.	Discovery?	q value	Individual P Value
SED vs. MOD	7.814	No	0.174	0.2071	A-B
SED vs. INT	-4.559	No	0.3209	0.4584	A-C
SED vs. CTL	16.77	Yes	0.0191	0.0091	A-D
MOD vs. INT	-12.37	No	0.0691	0.0493	B-C
MOD vs. CTL	8.953	No	0.1572	0.1497	B-D
INT vs. CTL	21.33	Yes	0.0052	0.0012	C-D
Figure 8D
Omnibus
ANOVA summary
F	4.735
P value	0.0069
P value summary	**
Significant diff. among means (P < 0.05)?	Yes
R squared	0.2829
Posthoc comparisons
	Mean Diff.	Discovery?	q value	Individual P Value
SED vs. MOD	7.814	No	0.174	0.2071	A-B
SED vs. INT	-4.559	No	0.3209	0.4584	A-C
SED vs. CTL	16.77	Yes	0.0191	0.0091	A-D
MOD vs. INT	-12.37	No	0.0691	0.0493	B-C
MOD vs. CTL	8.953	No	0.1572	0.1497	B-D
INT vs. CTL	21.33	Yes	0.0052	0.0012	C-D
Figure 8E
Omnibus
ANOVA summary
F	13.31
P value	<0.0001
P value summary	****
Significant diff. among means (P < 0.05)?	Yes
R squared	0.5401
Posthoc comparisons
	Mean Diff.	Discovery?	q value	Individual P Value
SED vs. MOD	-0.08228	No	0.2093	0.2658	A-B
SED vs. INT	-0.03567	No	0.3337	0.6357	A-C
SED vs. CTL	-0.4033	Yes	<0.0001	<0.0001	A-D
MOD vs. INT	0.04661	No	0.3313	0.5259	B-C
MOD vs. CTL	-0.321	Yes	<0.0001	<0.0001	B-D
INT vs. CTL	-0.3676	Yes	<0.0001	<0.0001	C-D
Figure 8F
Omnibus
ANOVA summary
F	48.15
P value	<0.0001
P value summary	****
Significant diff. among means (P < 0.05)?	Yes
R squared	0.8005
Posthoc comparisons
	Mean Diff.	Discovery?	q value	Individual P Value
SED vs. MOD	1.881	No	0.5241	0.848	A-B
SED vs. INT	0.022	No	0.5241	0.9982	A-C
SED vs. CTL	-94.96	Yes	<0.0001	<0.0001	A-D
MOD vs. INT	-1.859	No	0.5241	0.8498	B-C
MOD vs. CTL	-96.84	Yes	<0.0001	<0.0001	B-D
INT vs. CTL	-94.98	Yes	<0.0001	<0.0001	C-D
Figure 8G
Omnibus
ANOVA summary
F	8.264
P value	0.0003
P value summary	***
Significant diff. among means (P < 0.05)?	Yes
R squared	0.4078
Posthoc comparisons
Two-stage linear step-up procedure of Benjamini, Krieger and Yekutieli	Mean Diff.	Discovery?	q value	Individual P Value
SED vs. MOD	7.447	No	0.1749	0.2342	A-B
SED vs. INT	0.662	No	0.4804	0.915	A-C
SED vs. CTL	26.81	Yes	0.0002	0.0001	A-D
MOD vs. INT	-6.785	No	0.1749	0.2777	B-C
MOD vs. CTL	19.36	Yes	0.0035	0.0033	B-D
INT vs. CTL	26.14	Yes	0.0002	0.0001	C-D

## Sheet: Figure 9
Figure 9A
Omnibus
Analysis of Deviance Table (Type II Wald chisquare tests)
Response: fibrosis
Chisq Df Pr(>Chisq)
G 61.8326 3 2.386e-13 ***
wall 20.9684 2 2.797e-05 ***
G:wall 5.2349 6 0.5141
Posthoc comparisons
$emmeans
G emmean SE df lower.CL upper.CL
Ctl 1.92 0.398 33.7 1.11 2.73
Int 5.67 0.398 33.7 4.86 6.48
Mod 4.37 0.378 33.7 3.60 5.14
Sed 5.76 0.381 34.8 4.98 6.53
Results are averaged over the levels of: wall
Degrees-of-freedom method: kenward-roger
Confidence level used: 0.95
$contrasts
contrast estimate SE df t.ratio p.value
Ctl - Int -3.755 0.563 33.7 -6.669 <.0001
Ctl - Mod -2.453 0.549 33.7 -4.469 0.0004
Ctl - Sed -3.839 0.551 34.2 -6.963 <.0001
Int - Mod 1.302 0.549 33.7 2.373 0.0691
Int - Sed -0.084 0.551 34.2 -0.152 1.0000
Mod - Sed -1.386 0.537 34.2 -2.583 0.0524
Results are averaged over the levels of: wall
Degrees-of-freedom method: kenward-roger
P value adjustment: BY method for 6 tests
Figure 9B
Omnibus
ANOVA summary
F	36.58
P value	<0.0001
P value summary	****
Significant diff. among means (P < 0.05)?	Yes
R squared	0.753
Posthoc comparisons
	Mean Diff.	Discovery?	q value	Individual P Value
SED vs. MOD	-29.52	No	0.0652	0.1034	A-B
SED vs. INT	-30.34	No	0.0652	0.0946	A-C
SED vs. CTL	-168.4	Yes	<0.0001	<0.0001	A-D
MOD vs. INT	-0.818	No	0.5057	0.9633	B-C
MOD vs. CTL	-138.9	Yes	<0.0001	<0.0001	B-D
INT vs. CTL	-138.1	Yes	<0.0001	<0.0001	C-D
Figure 9C
Omnibus
ANOVA summary
F	41.11
P value	<0.0001
P value summary	****
Significant diff. among means (P < 0.05)?	Yes
R squared	0.774
Posthoc comparisons
	Mean Diff.	Discovery?	q value	Individual P Value
SED vs. MOD	-25.38	No	0.0691	0.0878	A-B
SED vs. INT	-23.32	No	0.0728	0.1156	A-C
SED vs. CTL	-145.3	Yes	<0.0001	<0.0001	A-D
MOD vs. INT	2.061	No	0.4659	0.8875	B-C
MOD vs. CTL	-119.9	Yes	<0.0001	<0.0001	B-D
INT vs. CTL	-122	Yes	<0.0001	<0.0001	C-D
Figure 9D
Omnibus
ANOVA summary
F	21.19
P value	<0.0001
P value summary	****
Significant diff. among means (P < 0.05)?	Yes
R squared	0.6385
Posthoc comparisons
	Mean Diff.	Discovery?	q value	Individual P Value
SED vs. MOD	-8.226	No	0.3111	0.395	A-B
SED vs. INT	-2.573	No	0.4144	0.7893	A-C
SED vs. CTL	-65.43	Yes	<0.0001	<0.0001	A-D
MOD vs. INT	5.653	No	0.3514	0.5578	B-C
MOD vs. CTL	-57.2	Yes	<0.0001	<0.0001	B-D
INT vs. CTL	-62.86	Yes	<0.0001	<0.0001	C-D
Figure 9E
Omnibus
ANOVA summary
F	1.368
P value	0.2681
P value summary	ns
Significant diff. among means (P < 0.05)?	No
R squared	0.1023
